# Supplementary material for: From Chondrocytes to Chondrons, Maintenance of Phenotype and Matrix Production in a Composite 3D Hydrogel Scaffold
Source: MDPI journal article supplement (doi:10.3390/gels8020090), 2022-02-02
Supplement: s1 [file s1]

Supplementary Information for

# From Chondrocytes to Chondrons, Maintenance of Phenotype and Matrices Production in a Composite 3D Hydrogel Scaffold

Mahmoud Amr <sup>1</sup>, Alia Mallah <sup>1</sup>, Samina Yasmeen <sup>2</sup>, Bernard Van Wie <sup>3</sup>, Arda Gozen <sup>4</sup>, Juana

Mendenhall <sup>2</sup>, and Nehal I. Abu-Lail <sup>1,\*</sup>.

1 Department of Biomedical Engineering and Chemical Engineering, The University of Texas at San Antonio, San Antonio, Texas, 78249; mahmoud.amr@utsa.edu, alia.mallah@utsa.edu, Nehal.abu-lail@utsa.edu

2 Department of Chemistry, Morehouse College, Atlanta, Georgia, 30314; samina.yasmeen@morehouse.edu, juana.mendenhall@morehouse.edu

3 Gene and Linda Voiland School of Chemical Engineering and Bioengineering, Washington State University, Pullman, Washington, 99164-6515; bvanwie@wsu.edu

4 School of Mechanical and Materials Engineering, Washington State University, Pullman, Washington, 99164-2920; arda.gozen@wsu.edu

\* Correspondence: Nehal.abu-lail@utsa.edu; One UTSA Circle, Department of Biomedical Engineering and Chemical Engineering, The University of Texas at San Antonio, San Antonio, Texas 78249

## **S1. Materials Recipes**

### **S1.1. Papain digestion buffer**

The digestion buffer was made of 0.2 M Sodium Phosphate Buffer ( $\text{Na}_2\text{HPO}_4 - \text{NaH}_2\text{PO}_4$ ), at pH of 6.4 and was composed of:

- 8 mg/mL Sodium Acetate
- 4 mg/mL EDTA
- 0.8 mg/mL L-Cystine HCL

After dissolving all the solid powder in the buffer, 50  $\mu\text{L}/\text{mL}$  of Papain from papaya containing (0.1 mg enzyme) was added to make up the final volume. Papain digestion buffer is good for 7 days at 4 °C.

### **S1.2. DMMB dye solution**

Dissolve 0.016 mg/mL DMMB, 3.04 mg/mL glycine, 1.6 mg/mL, and 0.095 mL/mL 0.1 M acetic acid. Make up the volume to the volume needed with DI water. Filter the solution using 0.22  $\mu\text{m}$ , and protect from light, store for 1 month at room temperature.

### **S1.3. DMMB decomplexation solution**

The decomplexation buffer was made of 50 mM sodium acetate solution (pH 6.8) containing 10% propan-1-ol and was used to prepare 4 M guanidine hydrochloride. The solution is stable for 4 months at room temperature.

### **S1.4. Sirius red dye solution**

Dissolve 0.1 g Direct Red 80 in 100 mL saturated picric acid, mix gently till it's all dissolved.

Cover from light and store at room temperature up to 1 month.

#### **S1.5. Acid salt wash**

The acid salt wash was made of 1 mL glacial acetic acid in 200 mL DI water.

#### **S1.6. Sirius Red dye release solution**

The dye release solution was made of 0.1 M NaOH. It can be stored up to a month at room temperature.

#### **S1.7. Blocking buffer solution**

The antibody blocking buffer was made of 5% normal goat serum in 0.3% Triton X-100 diluted in PBS. It can be stored up to 1 month at 4 °C.

#### **S1.8. Antibody dilution buffer**

The antibody dilution buffer was made of 1% BSA in 0.3% Triton X-100 diluted in PBS. It can be stored up to 1 month at 4 °C.

### **S2. Corrected Total Cellular Reflectance/Fluorescence Quantification**

Following the protocol published by Luke Hammond [34], to quantify the corrected total cellular fluorescence (CTCF) using ImageJ software (<http://rsbweb.nih.gov/ij/download.html>):

- Open ImageJ and choose import the image you want to analyze (the channel for the protein of interest)
- Select: “Analyze>Set Measurements”
- Check the selection of the following: Area Integrated Intensity and Mean Grey Value

- In the image select an empty area on the background around the cell of interest using the selection tool
- Then click “Analyze>Measure”
- A measurement table will appear
- Repeat the process for all the cells you want to quantify CTCF for, in the end you will have a list of background integrated intensity values that you will average and use for the calculations.
- Now using the freehand selection tool select the area of each cell of interest and hit “Analyze>Measure” after each cell selection.
- In the end you will have a table of values for all the cells quantified
- The CTCF formula is :  $CTCF = Integrated\ Density - (Area\ of\ selected\ cell \times average\ of\ integrated\ density\ for\ background\ readings)$
- Report the values as Corrected Total Cellular Fluorescence (Arbitrary Unit or A.U.)
- The same can be done for histological images for RGB images, you can analyze and compare one of the 3 channels (in our case we analyzed the RED).
- Quantification can also be automated using BioTek’s Gen 5.0 software (BioTek Instruments Inc, Winooski, VT) if you have the software license.

### S3. Corrected Total Reflectance Comparison of Histological Staining

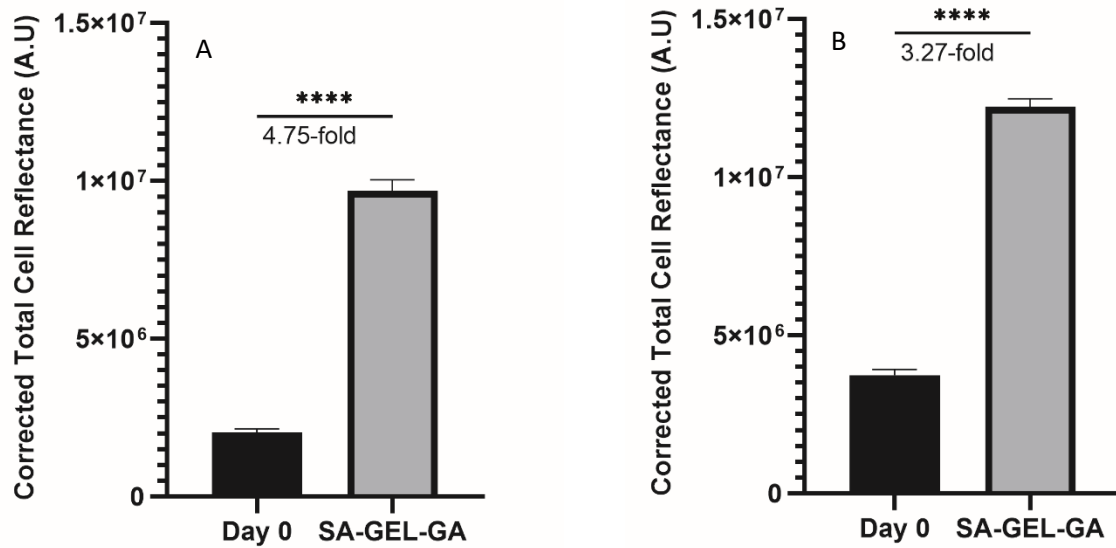

**Figure S1.** Corrected Total Cell Reflectance for A) Sirius Red histological staining of chondrons isolated from SA-GEL-GA vs day 0 chondrocytes, B) DMMB histological staining of chondrons isolated from SA-GEL-GA vs day 0 chondrocytes, data is presented as Mean±SEM, \*\*\*\* P < 0.0001, n = 3.
